# Supplementary material for: The Relationship Between Patient-Reported Severity of Hair Loss and Health-Related Quality of Life and Treatment Patterns Among Patients with Alopecia Areata
Source: PubMed Central journal article supplement — Dermatol Ther (Heidelb). 2022 Mar 29;12(4):989–97. doi: 10.1007/s13555-022-00702-4 (PMC9021335; doi:10.1007/s13555-022-00702-4), 2022-03-29
Supplement: 13555_2022_702_MOESM1_ESM.pdf [file 13555_2022_702_MOESM1_ESM.pdf]

**Title:** The Relationship Between Patient-Reported Severity of Hair Loss and Health-Related Quality of Life and Treatment Patterns Among Patients with Alopecia Areata

**Authors:** Heather L. Gelhorn<sup>1</sup>, Katelyn Cutts<sup>1</sup>, Emily Edson-Heredia<sup>2</sup>, Peter Wright<sup>2</sup>, Amy Delozier<sup>2</sup>, Jerry Shapiro<sup>3</sup>, Maryanne Senna<sup>4</sup>, Antonella Tosti<sup>5</sup>

<sup>1</sup>Evidera, Bethesda, MD, USA; <sup>2</sup>Eli Lilly and Company, Indianapolis, IN, USA; <sup>3</sup>The Ronald O. Perelman Department of Dermatology, New York University School of Medicine, New York, NY, USA;

<sup>4</sup>Massachusetts General Hospital, Boston, MA, USA; <sup>5</sup>University of Miami, Miami, FL, USA

**Corresponding Author:**

Heather L. Gelhorn, PhD

Email: Heather.Gelhorn@evidera.com

**Supplemental Table 1. Sociodemographic Characteristics**

| <b>Participant Sociodemographic Characteristic</b> | <b>Total (N=1327)</b> |
|----------------------------------------------------|-----------------------|
| Age, years, <i>Mean (SD) [range]</i>               | 39.7 (12.3) [18 – 84] |
| <i>Gender, n (%)</i>                               |                       |
| Female                                             | 775 (58.4%)           |
| <b>Racial Background/Ethnicity, n %</b>            |                       |
| Asian, non-Hispanic                                | 27 (2.0 %)            |
| Black, non-Hispanic                                | 341 (25.7 %)          |
| Hispanic only                                      | 42 (3.2 %)            |
| Multi-racial                                       | 156 (11.8 %)          |
| Other                                              | 57 (4.3 %)            |
| White, non-Hispanic                                | 699 (52.7 %)          |
| Prefer not to say                                  | 5 (0.4 %)             |
| <b>Relationship Status, n (%)</b>                  |                       |
| Single                                             | 261 (19.7 %)          |
| Married                                            | 928 (69.9 %)          |
| Domestic Partnership, unmarried                    | 56 (4.2 %)            |
| Separated or Divorced                              | 70 (5.3 %)            |
| Widowed                                            | 12 (0.9 %)            |
| <b>Highest Education Level, n (%)</b>              |                       |
| Less than high school                              | 15 (1.13 %)           |
| Secondary/high school/GED                          | 147 (11.1 %)          |
| Associate degree, technical, or trade school       | 376 (28.3 %)          |
| College/university degree (e.g., BA, BS)           | 591 (44.5 %)          |
| Post-graduate degree (e.g., MA, MBA, PhD)          | 198 (14.9 %)          |
| <b>Type of Health Insurance<sup>1</sup>, n (%)</b> |                       |
| Employer-provided insurance                        | 660 (49.7 %)          |
| Self-provided insurance (including Obama Care)     | 142(10.7 %)           |
| Veterans Affairs/Military healthcare               | 21 (1.6 %)            |
| Medicare                                           | 339 (25.6 %)          |
| Medicaid                                           | 90 (6.8 %)            |
| None (uninsured)                                   | 75 (5.7 %)            |

**Supplemental Table 2. Current Alopecia Non-Scalp Sign/Symptoms by Scalp Hair Loss Severity**

|                                                                                        | Current Scalp Hair Loss       |                                  |                                    |                                 |                                       | $\chi^2$ | P-Value |
|----------------------------------------------------------------------------------------|-------------------------------|----------------------------------|------------------------------------|---------------------------------|---------------------------------------|----------|---------|
|                                                                                        | No missing hair (0%) (n = 34) | A limited area (1-20%) (n = 528) | A moderate area (21-49%) (n = 347) | A large area (50-94%) (n = 135) | Nearly all or all (95-100%) (n = 283) |          |         |
| <b>Eyebrow: current, n (%)</b>                                                         |                               |                                  |                                    |                                 |                                       |          |         |
| I have full eyebrows on each eye                                                       | 23 (67.7%)                    | 205 (38.8%)                      | 87 (25.1%)                         | 23 (17.0%)                      | 15 (5.3%)                             | 744.1    | <0.001  |
| I have a minimal gap(s) or a minimal amount of thinning in at least one of my eyebrows | 11 (32.4%)                    | 251 (47.5%)                      | 175 (50.4%)                        | 42 (31.1%)                      | 36 (12.7%)                            |          |         |
| I have a large gap(s) or a large amount of thinning in at least one of my eyebrows     | 0 (0.0%)                      | 51 (9.7%)                        | 69 (19.9%)                         | 42 (31.1%)                      | 23 (8.1%)                             |          |         |
| I have no or barely any eyebrow hairs                                                  | 0 (0.0%)                      | 21 (4.0%)                        | 16 (4.6%)                          | 28 (20.7%)                      | 209 (73.9%)                           |          |         |
| <b>Upper and Lower Eyelashes: current, n (%)</b>                                       |                               |                                  |                                    |                                 |                                       |          |         |
| I have full eyelashes on each eyelid                                                   | 26 (76.5%)                    | 218 (41.3%)                      | 110 (31.7%)                        | 43 (31.9%)                      | 34 (12.0%)                            | 501.0    | <0.001  |
| I have a minimal gap or minimal gaps along the eyelids                                 | 4 (11.8%)                     | 221 (41.9%)                      | 141 (40.6%)                        | 42 (31.1%)                      | 44 (15.6%)                            |          |         |
| I have a large gap or large gaps along the eyelids                                     | 4 (11.8%)                     | 64 (12.1%)                       | 67 (19.3%)                         | 26 (19.3%)                      | 26 (9.2%)                             |          |         |
| I have no or barely any eyelash hair                                                   | 0 (0.0%)                      | 25 (4.7%)                        | 29 (8.4%)                          | 24 (17.8%)                      | 179 (63.3%)                           |          |         |
| <b>Fingernails and Toenails: current, n (%)</b>                                        |                               |                                  |                                    |                                 |                                       |          |         |
| Nails are not at all damaged                                                           | 27 (79.4%)                    | 300 (56.8%)                      | 134 (38.6%)                        | 60 (44.4%)                      | 110 (38.9%)                           | 95.7     | <0.001  |
| At least one nail is a little damaged                                                  | 3 (8.8%)                      | 164 (31.1%)                      | 127 (36.6%)                        | 34 (25.2%)                      | 79 (27.9%)                            |          |         |
| At least one nail is moderately damaged                                                | 4 (11.8%)                     | 57 (10.8%)                       | 76 (21.9%)                         | 31 (23.0%)                      | 72 (25.4%)                            |          |         |
| At least one nail is very damaged, or you have lost at least one nail                  | 0 (0.0%)                      | 7 (1.3%)                         | 10 (2.9%)                          | 10 (7.4%)                       | 22 (7.8%)                             |          |         |
| <b>Eye Irritation: in the past 7 days, n (%)</b>                                       |                               |                                  |                                    |                                 |                                       |          |         |
| My eyes have not been irritated                                                        | 23 (67.7%)                    | 275 (52.1%)                      | 138 (39.8%)                        | 33 (24.4%)                      | 119 (42.1%)                           | 66.3     | <0.001  |
| My eyes have been a little irritated                                                   | 8 (23.5%)                     | 181 (34.3%)                      | 133 (38.3%)                        | 63 (46.7%)                      | 94 (33.2%)                            |          |         |
| My eyes have been moderately irritated                                                 | 3 (8.8%)                      | 67 (12.7%)                       | 68 (19.6%)                         | 29 (21.5%)                      | 57 (20.1%)                            |          |         |
| My eyes have been severely irritated                                                   | 0 (0.0%)                      | 5 (1.0%)                         | 8 (2.3%)                           | 10 (7.4%)                       | 13 (4.6%)                             |          |         |

**Supplemental Table 3. Duration of Alopecia Areata and History of Hair Loss by Current Scalp Hair Loss**

|                                                                                                                                    | Current Scalp Hair Loss           |                                    |                                     |                                    |                                       | Overall F-value | P-Value |
|------------------------------------------------------------------------------------------------------------------------------------|-----------------------------------|------------------------------------|-------------------------------------|------------------------------------|---------------------------------------|-----------------|---------|
|                                                                                                                                    | No missing hair (0%) (n = 34)     | A limited area (1-20%) (n = 528)   | A moderate area (21-49%) (n = 347)  | A large area (50-94%) (n = 135)    | Nearly all or all (95-100%) (n = 283) |                 |         |
| <b>Duration of Alopecia Areata, years</b>                                                                                          |                                   |                                    |                                     |                                    |                                       |                 |         |
| Mean (SD) [range]                                                                                                                  | 7.1 ± 6.2<br>[1 – 24.3]           | 5.0 ± 6.9<br>[0.2 – 54.1]          | 7.3 ± 9.4<br>[0.4 – 52.2]           | 14.4 ± 12.0<br>[0.9 – 53.7]        | 22.9 ± 13.9<br>[0.3 – 67.4]           | 165.8           | <0.001  |
| Number of Episodes of Hair Loss <sup>2</sup>                                                                                       | n = 34                            | n = 526                            | n = 341                             | n = 134                            | n = 276                               |                 |         |
| Mean (SD) [range]                                                                                                                  | 1.8 ± 1.3 <sup>a</sup><br>[1 - 8] | 3.5 ± 5.6 <sup>a</sup><br>[0 - 60] | 4.2 ± 5.3 <sup>ab</sup><br>[0 - 50] | 7.4 ± 9.3 <sup>c</sup><br>[0 - 50] | 5.4 ± 8.5 <sup>b</sup><br>[0 - 60]    | 12.3            | <0.001  |
| Since the time you first started experiencing symptoms of alopecia areata, how would you describe your hair loss over time?, n (%) |                                   |                                    |                                     |                                    |                                       | $\chi^2$        | P-Value |
| Improving                                                                                                                          | 23 (67.7%)                        | 140 (26.5%)                        | 35 (10.1%)                          | 8 (5.9%)                           | 8 (2.8%)                              | 485.5           | <0.001  |
| Stable/no changes                                                                                                                  | 4 (11.8%)                         | 169 (32.0%)                        | 83 (23.9%)                          | 8 (5.9%)                           | 47 (16.6%)                            |                 |         |
| Worsening slowly                                                                                                                   | 2 (5.9%)                          | 126 (23.9%)                        | 139 (40.1%)                         | 52 (38.5%)                         | 52 (18.4%)                            |                 |         |
| Worsening rapidly                                                                                                                  | 1 (2.9%)                          | 29 (5.5%)                          | 15 (4.3%)                           | 18 (13.3%)                         | 116 (41.0%)                           |                 |         |
| Unpredictable hair loss and regrowth                                                                                               | 3 (8.8%)                          | 62 (11.7%)                         | 74 (21.3%)                          | 49 (36.3%)                         | 53 (18.7%)                            |                 |         |
| Not Sure                                                                                                                           | 1 (2.9%)                          | 2 (0.4%)                           | 1 (0.3%)                            | 0 (0.0%)                           | 7 (2.5%)                              |                 |         |
| Current Hair Loss Lasted for, n (%)                                                                                                |                                   |                                    |                                     |                                    |                                       | $\chi^2$        | P-Value |
| Less than 1 year                                                                                                                   | 20 (58.8%)                        | 248 (47.0%)                        | 90 (25.9%)                          | 32 (23.7%)                         | 27 (9.5%)                             | 509.6           | <0.001  |
| 1 – 4 years                                                                                                                        | 13 (38.2%)                        | 247 (46.8%)                        | 182 (52.5%)                         | 60 (44.4%)                         | 39 (13.8%)                            |                 |         |
| More than 4 years                                                                                                                  | 1 (2.9%)                          | 33 (6.3%)                          | 75 (21.6%)                          | 43 (31.9%)                         | 217 (76.7%)                           |                 |         |

<sup>1</sup>Pairwise comparisons between means were performed using Tukey's test adjusting for multiple comparisons at p <0.05. Means followed by a common letter are not significantly different.

<sup>2</sup>Analysis performed using Episodes of Hair Loss variable trimmed to exclude observations with reported values of 61 episodes or more (n = 1311).

**Supplemental Table 4. Treatment Experience by Current Scalp Hair Loss**

| Alopecia Areata Treatment                                   | Ever Used<br>n (%) | Currently on<br>n (%) <sup>1</sup> | Current Scalp Hair Loss |                           |                             |                          |                                |
|-------------------------------------------------------------|--------------------|------------------------------------|-------------------------|---------------------------|-----------------------------|--------------------------|--------------------------------|
|                                                             |                    |                                    | No missing hair<br>(0%) | A limited area<br>(1-20%) | A moderate area<br>(21-49%) | A large area<br>(50-94%) | Nearly all or all<br>(95-100%) |
| Oral Treatments                                             | 364<br>(33.8%)     | 208<br>(24.3%)                     | 4 (1.9%)                | 97<br>(46.6%)             | 67<br>(32.2%)               | 12 (5.8%)                | 28<br>(13.5%)                  |
| Topical Treatments (applied to the skin)                    | 624<br>(57.9%)     | 230<br>(26.9%)                     | 2 (0.9%)                | 90<br>(39.1%)             | 88<br>(38.3%)               | 34<br>(14.8%)            | 16 (7.0%)                      |
| Injection Treatments                                        | 445<br>(41.3%)     | 113<br>(13.2%)                     | 3 (2.7%)                | 61<br>(54.0%)             | 35<br>(31.0%)               | 7 (6.2%)                 | 7 (6.2%)                       |
| Phototherapy (e.g. PUVA, psoralen plus UVB)                 | 165<br>(15.3%)     | 94<br>(11.0%)                      | 2 (2.1%)                | 49<br>(52.1%)             | 36<br>(38.3%)               | 7 (7.5%)                 | 0 (0.0%)                       |
| Laser Therapy                                               | 137<br>(12.7%)     | 74 (8.7%)                          | 1 (1.4%)                | 42<br>(56.8%)             | 26<br>(35.1%)               | 5 (6.8%)                 | 0 (0.0%)                       |
| Platelet-Rich Plasma (PRP)                                  | 44<br>(4.1%)       | 21 (2.5%)                          | 0 (0.0%)                | 10<br>(47.6%)             | 10<br>(47.6%)               | 1 (4.8%)                 | 0 (0.0%)                       |
| Dietary changes or supplements                              | 354<br>(32.8%)     | 228<br>(26.7%)                     | 3 (1.3%)                | 86<br>(37.7%)             | 76<br>(33.3%)               | 33<br>(14.5%)            | 30<br>(13.2%)                  |
| Acupuncture                                                 | 108<br>(10.0%)     | 26 (3.0%)                          | 0 (0.0%)                | 16<br>(61.5%)             | 6 (23.1%)                   | 2 (7.7%)                 | 2 (7.7%)                       |
| Therapy with a psychologist or psychiatrist                 | 191<br>(17.7%)     | 74 (8.7%)                          | 1 (1.4%)                | 24<br>(32.4%)             | 23<br>(31.1%)               | 8 (10.8%)                | 18<br>(24.3%)                  |
| Non-medical intervention (e.g., wearing wigs or camouflage) | 373<br>(34.6%)     | 266<br>(31.1%)                     | 0 (0.0%)                | 34<br>(12.8%)             | 40<br>(15.0%)               | 44<br>(16.5%)            | 148<br>(55.6%)                 |
| Other                                                       | 38<br>(3.5%)       | 18 (2.1%)                          | 0 (0.0%)                | 6 (33.3%)                 | 3 (16.7%)                   | 5 (27.8%)                | 4 (22.2%)                      |
| No Previous Treatment Experience                            | 249<br>(23.1%)     |                                    |                         |                           |                             |                          |                                |
| No Current Treatment Experience                             |                    | 472<br>(35.6%)                     |                         |                           |                             |                          |                                |

Supplemental Figure 1. Health-Related Quality of Life (Skindex-16) by Eyebrow Hair Loss

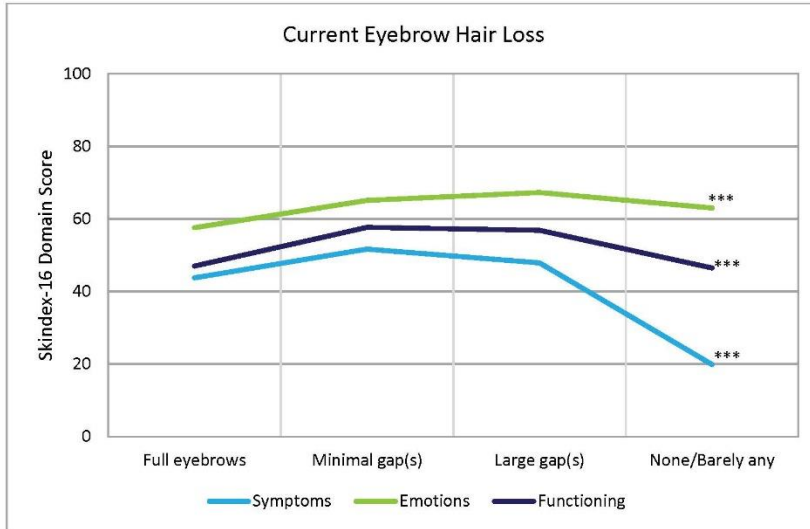

\*\*\* p<0.0001; Pairwise comparisons between group means were performed using the Tukey-Kramer test adjusting for multiple comparisons

Supplemental Figure 2. Health-Related Quality of Life (Skindex-16) by Eyelash Hair Loss

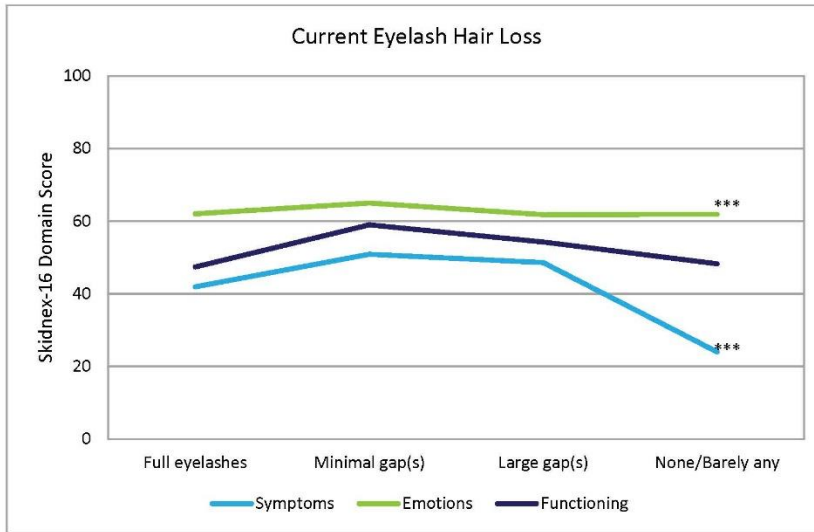

\*\*\*  $p < 0.0001$ ; Pairwise comparisons between group means were performed using the Tukey-Kramer test adjusting for multiple comparisons
